# Supplementary material for: Effect of Thermostable Enzymes Produced by Psychrotrophic Bacteria in Raw Milk on the Quality of Ultra-High Temperature Sterilized Milk
Source: MDPI journal article supplement (doi:10.3390/foods12203752), 2023-10-12
Supplement: s1 [file s1]

### Figure captions

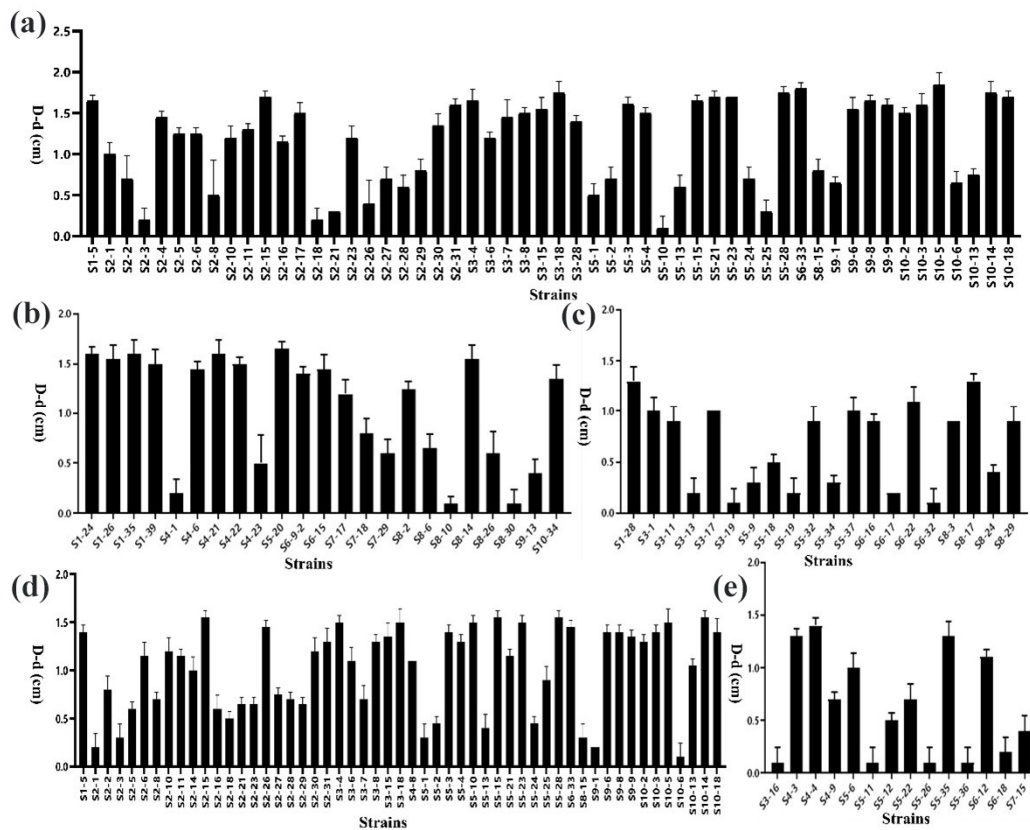

**Figure S1**

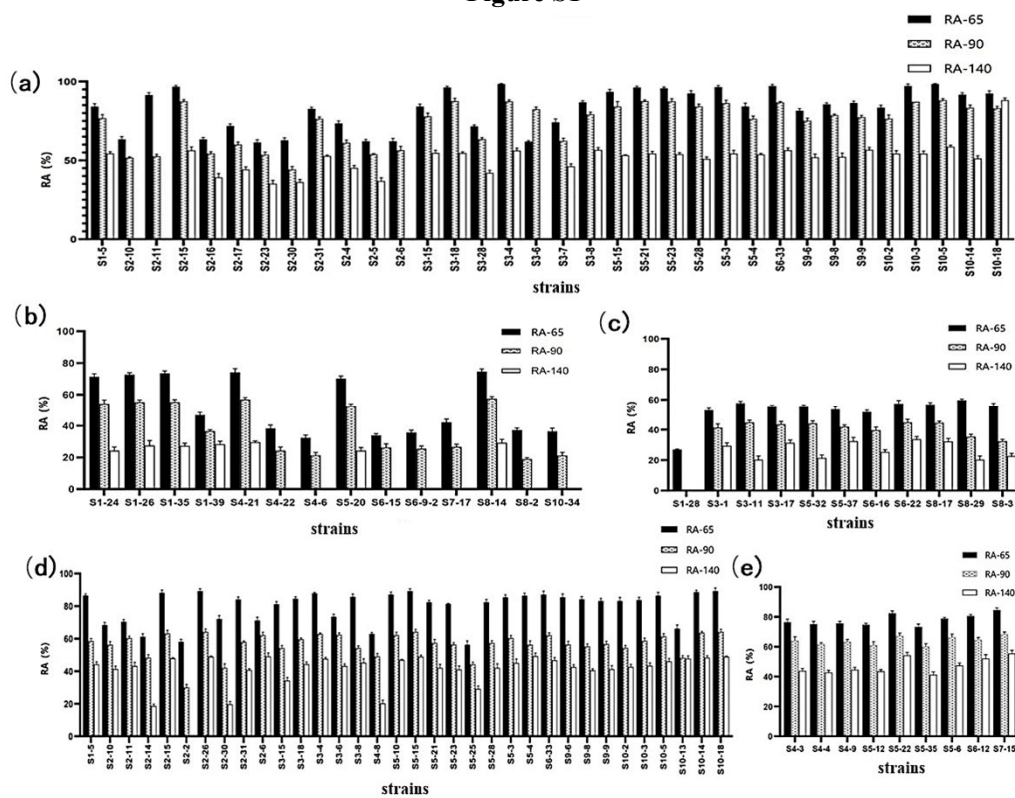

**Figure S2**

Table S1 The main components and contents of sterilized milk

| Genus                   | Species                     | Number | Serial number                                                                                         |
|-------------------------|-----------------------------|--------|-------------------------------------------------------------------------------------------------------|
| <i>Pseudomonas</i>      | <i>fluorescens</i>          | 15     | S2-15 S2-26 S3-4 S3-18 S5-3 S5-10 S5-15 S5-21 S5-23<br>S5-28 S6-33 S10-3 S10-5 S10-14 S10-18          |
|                         | <i>azotoformans</i>         | 9      | S1-5 S2-31 S3-8 S3-15 S5-4 S9-6 S9-8 S9-9 S10-2                                                       |
|                         | <i>lurida</i>               | 8      | S2-2 S2-3 S2-8 S2-18 S2-21 S2-27 S2-28 S2-29                                                          |
|                         | <i>psychrophila</i>         | 6      | S5-1 S5-2 S5-13 S5-24 S8-15 S9-1                                                                      |
|                         | <i>fragi</i>                | 4      | S2-1 S2-5 S2-16 S2-23                                                                                 |
|                         | <i>cedrina</i>              | 4      | S2-4 S2-17 S3-7 S3-28                                                                                 |
|                         | <i>lundensis</i>            | 4      | S2-6 S2-10 S2-11 S3-6                                                                                 |
|                         | <i>mandelii</i>             | 4      | S2-12 S4-16 S4-28 S4-33                                                                               |
|                         | <i>fulva</i>                | 3      | S4-11 S4-13 S4-31                                                                                     |
|                         | <i>anguilliseptica</i>      | 2      | S1-25 S1-36                                                                                           |
|                         | <i>extremorientalis</i>     | 2      | S2-13 S2-22                                                                                           |
|                         | <i>putida</i>               | 2      | S2-14 S4-8                                                                                            |
|                         | <i>jessenii</i>             | 1      | S2-25                                                                                                 |
|                         | <i>gessardii</i>            | 1      | S2-30                                                                                                 |
|                         | <i>veronii</i>              | 1      | S5-8                                                                                                  |
|                         | <i>maritimus</i>            | 1      | S10-6                                                                                                 |
|                         | <i>brenneri</i>             | 1      | S10-13                                                                                                |
| <i>Chryseobacterium</i> | <i>carnipullorum</i>        | 6      | S1-24 S1-26 S1-35 S4-21 S5-20 S8-14                                                                   |
|                         | <i>Chryseobacterium sp.</i> | 6      | S8-10 S8-16 S8-27 S8-30 S8-31 S9-12                                                                   |
|                         | <i>scophthalmum</i>         | 4      | S4-6 S4-22 S6-15 S6-9-2                                                                               |
|                         | <i>indologenes</i>          | 2      | S7-17 S7-29                                                                                           |
|                         | <i>balustinum</i>           | 2      | S8-6 S8-26                                                                                            |
|                         | <i>chaponense</i>           | 1      | S1-39                                                                                                 |
|                         | <i>aahli</i>                | 1      | S4-1                                                                                                  |
|                         | <i>formosense</i>           | 1      | S4-23                                                                                                 |
|                         | <i>xixisoli</i>             | 1      | S7-18                                                                                                 |
|                         | <i>indoltheticum</i>        | 1      | S8-2                                                                                                  |
|                         | <i>joostei</i>              | 1      | S9-13                                                                                                 |
|                         | <i>haifense</i>             | 1      | S10-36                                                                                                |
|                         | <i>anthropi</i>             | 1      | S10-34                                                                                                |
| <i>Lactococcus</i>      | <i>raffinolactis</i>        | 17     | S3-1 S3-11 S3-13 S3-17 S5-9 S5-18 S5-19 S5-32 S5-34<br>S5-37 S6-16 S6-17 S6-22 S8-3 S8-17 S8-24 S8-29 |
|                         | <i>Lactococcus sp.</i>      | 2      | S1-2 S1-19                                                                                            |
|                         | <i>piscium</i>              | 1      | S1-28                                                                                                 |

---

|                      |                   |   |                                           |
|----------------------|-------------------|---|-------------------------------------------|
|                      | <i>lactis</i>     | 1 | S3-19                                     |
|                      | <i>laudensis</i>  | 1 | S6-32                                     |
| <i>Acinetobacter</i> | <i>guillouiae</i> | 7 | S4-3 S4-4 S4-9 S5-6 S5-11 S5-12 S5-35     |
|                      | <i>johnsonii</i>  | 7 | S3-16 S5-22 S5-26 S5-36 S6-12 S6-18 S7-15 |
|                      | <i>albensis</i>   | 4 | S2-20 S2-25 S8-1 S8-7                     |

---
